# Supplementary material for: Predictive Model for the Assessment of Preoperative Frailty Risk in the Elderly
Source: MDPI journal article supplement (doi:10.3390/jcm10194612), 2021-10-08
Supplement: s1 [file s1]

**Figure S1. Distribution of emergency operations by surgical departments**

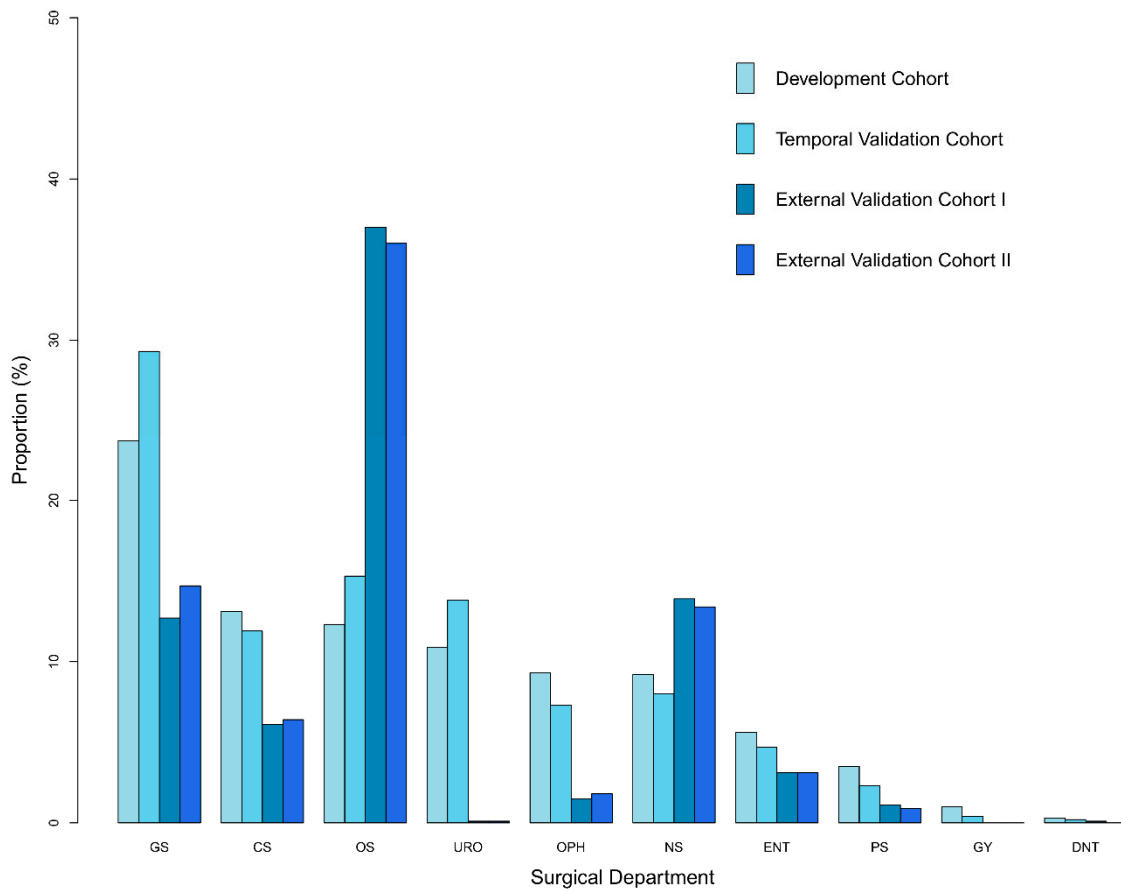

GS, General Surgery; CS, Cardiothoracic Surgery; OS, Orthopedic surgery; URO, Urologic surgery; OPH, ophthalmic surgery; NS, Neuro-Surgery; ENT, Ear, Nose and Throat surgery; PS, Plastic Surgery; GY, Gynecologic surgery; DNT, Dental Surgery.

**Figure S2. Distribution of Operation Frailty Risk Score by surgical departments**

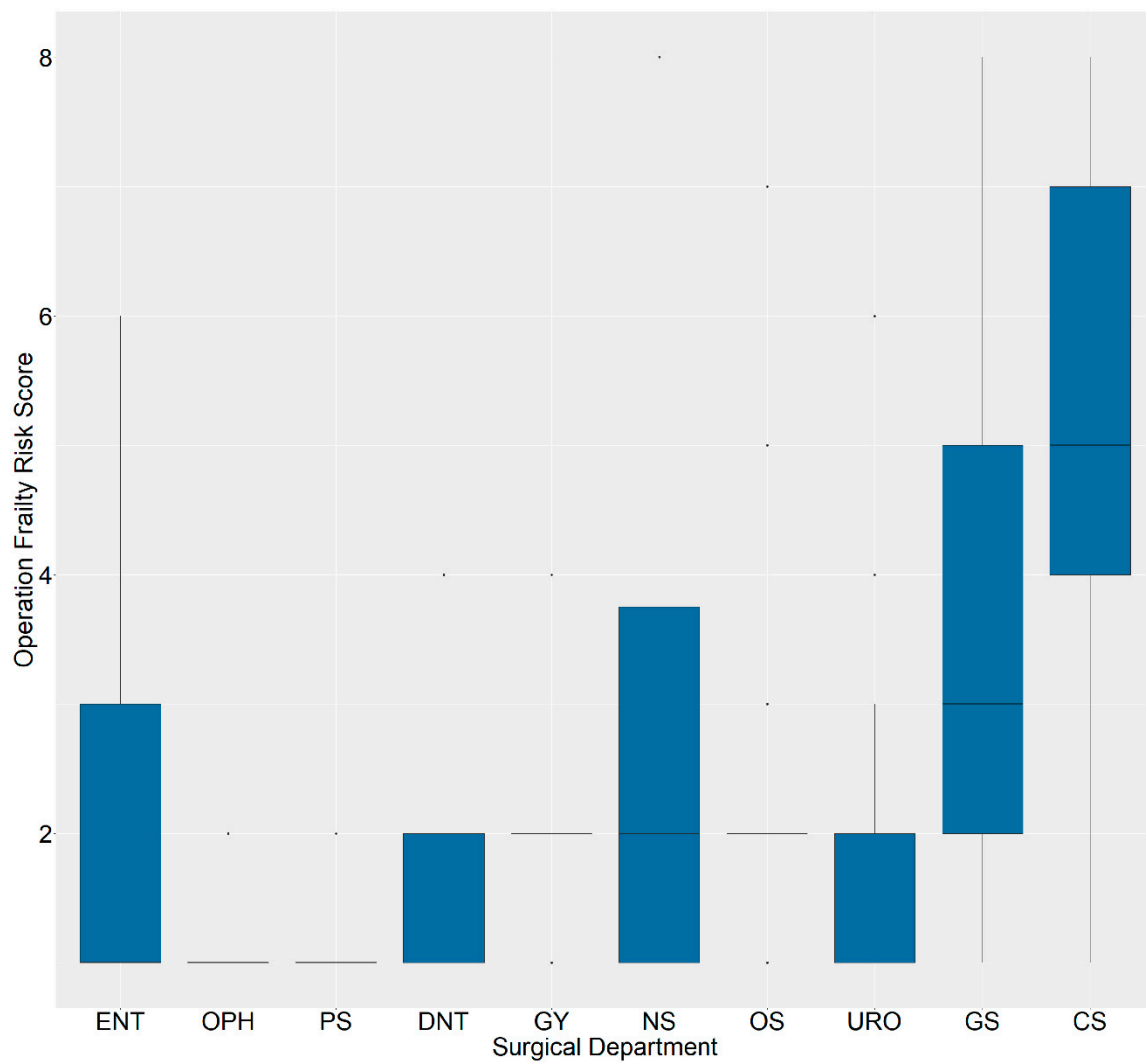

GS, General Surgery; CS, Cardiothoracic Surgery; OS, Orthopedic surgery; URO, Urologic surgery; OPH, ophthalmic surgery; NS, Neuro-Surgery; ENT, Ear, Nose and Throat surgery; PS, Plastic Surgery; GY, Gynecologic surgery; DNT, Dental Surgery.

**Table S1. Operation Group classified by clinical experts**

| OG | Surgical depart | Operation code | Name of operation                                                                      |
|----|-----------------|----------------|----------------------------------------------------------------------------------------|
| 1  | CS              | O1318          | Endoscopic Cryotherapy[Tracheal, Bronchial, Lung Tumor]                                |
| 1  | DNT             | U4430          | Alveoloplasty                                                                          |
| 1  | DNT             | U4690          | Reduction of Luxated Teeth                                                             |
| 1  | DNT             | U4457          | Intraoral Antiphlogosis-Osteitis of Jaw, Osteomyelitis of Jaw etc.                     |
| 1  | ENT             | O0951          | Single Nasal Polypectomy                                                               |
| 1  | ENT             | S5572          | Foreign Body Removal of Ear Canal Or Removal of Impacted Cerumen-Extremely Complex     |
| 1  | ENT             | S5600          | Myringotomy                                                                            |
| 1  | ENT             | S5620          | Ventilation Tube Insertion                                                             |
| 1  | ENT             | O1001          | Submucosal Resection or Septoplasty (Cartilage)                                        |
| 1  | ENT             | O1002          | Submucosal Resection or Septoplasty (Bone)                                             |
| 1  | ENT             | O1004          | Incision of Nasal Septal Hematoma or Abscess                                           |
| 1  | ENT             | O1010          | Inferior Turbinectomy                                                                  |
| 1  | ENT             | O1011          | Inferior Turbinectomy                                                                  |
| 1  | ENT             | O1015          | Turbinate Outfracture                                                                  |
| 1  | ENT             | O1050          | Intranasal Antrostomy                                                                  |
| 1  | ENT             | O1051          | Intranasal Antrostomy                                                                  |
| 1  | ENT             | O1092          | Operation of Frontal Sinus (Osteoplasty Following Brow Incision)                       |
| 1  | ENT             | O1101          | Intranasal Ethmoidectomy                                                               |
| 1  | ENT             | O1110          | Extranasal Ethmoidectomy                                                               |
| 1  | ENT             | O1120          | Intranasal Sphenoidectomy                                                              |
| 1  | ENT             | O1121          | Intranasal Sphenoidectomy                                                              |
| 1  | ENT             | O1131          | Radical Operation of Pansinusitis                                                      |
| 1  | ENT             | O1141          | Radical Operation of Maxillary And Ethmoid Sinus                                       |
| 1  | ENT             | O1152          | Radical Operation of Maxillary, Ethmoid And Sphenoid Sinus                             |
| 1  | ENT             | O1161          | Radical Operation of Frontal And Ethmoid Sinus                                         |
| 1  | ENT             | O1176          | Radical Operation of Frontal, Ethmoid And Maxillary Sinus                              |
| 1  | ENT             | O1215          | Removal of Epiglottic Cyst                                                             |
| 1  | ENT             | O1231          | Removal of Vocal Nodule or Polyp                                                       |
| 1  | ENT             | O1264          | Operation of Vocal Cord Paralysis, Foreign Material Injection (Unilateral)             |
| 1  | ENT             | OA273          | Operation of Laryngeal Stenosis, Laser Operation                                       |
| 1  | ENT             | Q2300          | Tonsillectomy                                                                          |
| 1  | GS              | M6700          | Removal of Biliary Residual Stone                                                      |
| 1  | GS              | M6830          | Percutaneous Enterostomy                                                               |
| 1  | GS              | M6850          | Cyst Aspiration                                                                        |
| 1  | GS              | Q7670          | Colonoscopic Removal Of Foreign Body                                                   |
| 1  | GS              | M6721          | Fluoroscopic Dilatation of Upper Gastrointestinal Tract Stenosis with Balloon Catheter |
| 1  | GS              | M6722          | Fluoroscopic Dilatation of Upper Gastrointestinal Tract Stenosis with Stent            |
| 1  | GS              | Q7692          | Colonoscopic Dilatation Of Colonic Stenosis-Stent Insertion                            |
| 1  | GS              | Q7771          | Dilatation Of Bile Duct-Simple                                                         |

|   |     |       |                                                                                                  |
|---|-----|-------|--------------------------------------------------------------------------------------------------|
| 1 | GS  | Q7773 | Removal Of Bile Duct Stone                                                                       |
| 1 | GS  | Q7774 | Removal Of Bile Duct Stone                                                                       |
| 1 | GS  | Q7701 | Colonoscopic Operation Of Colonic Tumor-Polypectomy                                              |
| 1 | GS  | Q7702 | Colonoscopic Operation Of Colonic Tumor                                                          |
| 1 | GS  | N0900 | Excision of Ganglion                                                                             |
| 1 | GS  | P2121 | Operation For Axillary Lymph Node-Excision                                                       |
| 1 | GS  | P2122 | Operation For Axillary Lymph Node-Dissection                                                     |
| 1 | GS  | P2124 | Axillary Sentinel Lymph Node-Excision                                                            |
| 1 | GS  | P2141 | Operation For Inguinal Lymph Node (Excision)                                                     |
| 1 | GS  | P2142 | Operation For Inguinal Lymph Node (Dissection)                                                   |
| 1 | GS  | Q3013 | Operation of Hemorrhoids-Hemorrhoidectomy                                                        |
| 1 | GS  | Q7420 | Oddi's Sphincterotomy And Sphincteroplasty                                                       |
| 1 | GS  | Q2936 | Perineal Operation-Others                                                                        |
| 1 | GS  | Q2977 | Seton Apply                                                                                      |
| 1 | GS  | O0266 | Extensive Resection of Varicose Vein-Total Stripping of Saphenous Vein, Stab Abulsion of Varices |
| 1 | GY  | R4521 | Dilatation And Curettage                                                                         |
| 1 | GY  | R4165 | Pelviscopic Fulguration                                                                          |
| 1 | GY  | R4240 | Polypectomy of Cervical Mucosa                                                                   |
| 1 | GY  | R4262 | Conization of Cervix-Loop Electrosurgical Excision                                               |
| 1 | NS  | N0471 | Percutaneous Vertebroplasty[Including Discography]                                               |
| 1 | NS  | N0472 | Percutaneous Vertebroplasty[Including Discography], From 2nd Site                                |
| 1 | NS  | N0473 | Percutaneous Balloon Kyphoplasty[Including Discography]                                          |
| 1 | NS  | N0474 | Percutaneous Balloon Kyphoplasty[Including Discography]                                          |
| 1 | NS  | N1491 | Discectomy (Invasive)-Cervical Spine                                                             |
| 1 | NS  | N1492 | Discectomy (Invasive)-Thoracic Spine                                                             |
| 1 | NS  | N1493 | Discectomy (Invasive)-Lumbar Spine                                                               |
| 1 | NS  | N2472 | Removal of Implant For Internal Fixation of Spine[Posterior]                                     |
| 1 | NS  | S4595 | Neuroplasty-Major Peripheral Plexus                                                              |
| 1 | NS  | S4596 | Neuroplasty-Hand And Foot                                                                        |
| 1 | NS  | S4825 | Radiofrequency Ablation of Spine, Percutaneous-Simple                                            |
| 1 | NS  | S4843 | Implantation of Intrathecal Drug Infusion Pump                                                   |
| 1 | NS  | SY622 | Implantation, Change Or Removal of Spinal Neurostimulator Electrodes                             |
| 1 | NS  | SY637 | Lead Implantation of Spinal Cord Stimulator And Trial Stimulation                                |
| 1 | NS  | SY639 | Removal of Spinal Cord Stimulator Lead                                                           |
| 1 | NS  | S4851 | Navigational Procedure for Surgery -> group 1                                                    |
| 1 | OPH | S4880 | Evisceration                                                                                     |
| 1 | OPH | S4891 | Removal of Intraocular Foreign Body-With Magnet                                                  |
| 1 | OPH | S4895 | Removal of Intraorbital Foreign Body                                                             |
| 1 | OPH | S4911 | Implantation of Ocular Implant                                                                   |
| 1 | OPH | S4921 | Surgery of Corneal Ulcer-Diathermy                                                               |
| 1 | OPH | S4923 | Surgery of Corneal Ulcer-Conjunctival Flap                                                       |
| 1 | OPH | S4941 | Conjunctival Suture                                                                              |
| 1 | OPH | S4950 | Excision of Conjunctival Mass                                                                    |
| 1 | OPH | S4960 | Curettage of Conjunctival Concretion                                                             |

|   |     |       |                                                                                        |
|---|-----|-------|----------------------------------------------------------------------------------------|
| 1 | OPH | S4990 | Removal of Scleral Foreign Body                                                        |
| 1 | OPH | S5000 | Scleral Suture                                                                         |
| 1 | OPH | S5011 | Scleral Transplantation                                                                |
| 1 | OPH | S5021 | Synechiolysis                                                                          |
| 1 | OPH | S5030 | Optical Iridectomy                                                                     |
| 1 | OPH | S5033 | Surgery for Glaucoma-Trabeculectomy                                                    |
| 1 | OPH | S5043 | Surgery for Glaucoma-Trabeculectomy                                                    |
| 1 | OPH | S5044 | Surgery for Glaucoma-Photocoagulation for Iris, Ciliary Body                           |
| 1 | OPH | S5049 | Glaucoma Implant Surgery                                                               |
| 1 | OPH | S5050 | Vitreous Aspiration                                                                    |
| 1 | OPH | S5091 | Anterior Chamber Irrigation                                                            |
| 1 | OPH | S5111 | Surgery for Cataract Or Lens-Extracapsular Or Intracapsular Extraction                 |
| 1 | OPH | S5112 | Surgery for After Cataract                                                             |
| 1 | OPH | S5116 | Intraocular Lens Implantation-Secondary                                                |
| 1 | OPH | S5117 | Intraocular Lens Implantation-Primary                                                  |
| 1 | OPH | S5118 | Intraocular Lens Exchange                                                              |
| 1 | OPH | S5119 | Surgery for Cataract Or Lens-Phacoemulsification                                       |
| 1 | OPH | S5121 | Vitrectomy-Total                                                                       |
| 1 | OPH | S5122 | Vitrectomy-Partial                                                                     |
| 1 | OPH | S5130 | Retinal Detachment Surgery                                                             |
| 1 | OPH | S5140 | Cryopexy for Retinal Tear                                                              |
| 1 | OPH | S5145 | Periretinal Membrane Peeling                                                           |
| 1 | OPH | S5160 | Panretinal Photocoagulation                                                            |
| 1 | OPH | S5161 | Endolaser Photocoagulation                                                             |
| 1 | OPH | S5176 | Strabismus Surgery (Complex)-Multiple Muscle                                           |
| 1 | OPH | S5231 | Removal of Orbital Tumor-Simple                                                        |
| 1 | OPH | S5245 | Excision of Eyelid Tumor-Benign                                                        |
| 1 | OPH | S5292 | Surgery for Blepharoptosis-Muscle Resection                                            |
| 1 | OPH | S5293 | Surgery for Blepharoptosis-Others                                                      |
| 1 | OPH | S5321 | Conjunctival Sac Reformation-Partial                                                   |
| 1 | OPH | S5342 | Operation of Pterygium-Others                                                          |
| 1 | OPH | S5371 | Keratoplasty-Superficial                                                               |
| 1 | OPH | S5372 | Keratoplasty-Full Thickness                                                            |
| 1 | OPH | S5374 | Keratoplasty-Endothelial Lamellar                                                      |
| 1 | OPH | S5380 | Primary Closure of Cornea                                                              |
| 1 | OPH | S5421 | Suture of Eyelid Laceration-Simple                                                     |
| 1 | OPH | S5422 | Suture of Eyelid Laceration-Through And Through                                        |
| 1 | OPH | S5450 | Tarsorrhaphy                                                                           |
| 1 | OPH | S5480 | Reconstruction of Lacrimal Canaliculi                                                  |
| 1 | OPH | S5540 | Dacryocystorhinostomy                                                                  |
| 1 | OS  | M0031 | Removal of Foreign Body In Skin, Subcutaneous Tissue or Muscle with Incision of Fascia |
| 1 | OS  | M0032 | Removal of Foreign Body In Skin, Subcutaneous Tissue or Muscle, Others                 |
| 1 | OS  | N0641 | Closed Reduction of Fractured Extremity[Pelvis,Femur]                                  |
| 1 | OS  | N0642 | Closed Reduction of Fractured Extremity[Humerus,Tibia]                                 |

|   |    |       |                                                                                             |
|---|----|-------|---------------------------------------------------------------------------------------------|
| 1 | OS | N0643 | Closed Reduction of Fractured Extremity[Forearm Bone]                                       |
| 1 | OS | N0644 | Closed Reduction of Fractured Extremity[Carpal Bone,Tarsal Bone]                            |
| 1 | OS | N0645 | Closed Reduction of Fractured Extremity[Metacarpal, Metatarsal, Finger, Toe]                |
| 1 | OS | N0761 | Closed Reduction of Dislocation[Hip]                                                        |
| 1 | OS | N0762 | Closed Reduction of Dislocation[Shoulder]                                                   |
| 1 | OS | N0763 | Closed Reduction of Dislocation[Elbow, Knee]                                                |
| 1 | OS | N0764 | Closed Reduction of Dislocation[Wrist, Ankle, Finger, Toe]                                  |
| 1 | OS | N0780 | Brisement Force (Manipulation of Joint)                                                     |
| 1 | OS | N0912 | Simple Tendon Suture                                                                        |
| 1 | OS | N0972 | Removal of Implant for Internal Fixation of Extremities[Femur]                              |
| 1 | OS | N0973 | Removal of Implant for Internal Fixation of Extremities[Humerus, Scapula]                   |
| 1 | OS | N0974 | Removal of Implant for Internal Fixation of Extremities[Radius And Ulnar, Tibia And Fibula] |
| 1 | OS | N0977 | Removal of Implant for Internal Fixation of Extremities[Radius and Ulnar, Tibia and Fibula] |
| 1 | OS | N0991 | Closed Pinning[Femur]                                                                       |
| 1 | OS | N0995 | Closed Pinning[Clavicle, Patella, Carpal Bone, Tarsal Bone]                                 |
| 1 | PS | N0210 | Operation For Ingrowing Nail                                                                |
| 1 | PS | N0215 | Guttering For Ingrowing Nail                                                                |
| 1 | PS | N0141 | Excision of Skin Benign Tumor (Simple, Superficial)                                         |
| 1 | PS | N0142 | Excision of Skin Benign Tumor (Others, Extended To Muscle Layer)                            |
| 1 | PS | N0170 | Split Thickness Skin Graft-Others (900cm <sup>2</sup> Over)                                 |
| 1 | PS | N0173 | Split Thickness Skin Graft-Face or Joint (25cm <sup>2</sup> Below)                          |
| 1 | PS | N0174 | Split Thickness Skin Graft-Face or Joint (25cm <sup>2</sup> Over)                           |
| 1 | PS | N0175 | Split Thickness Skin Graft-Others (25cm <sup>2</sup> Below)                                 |
| 1 | PS | N0176 | Split Thickness Skin Graft-Others (25cm <sup>2</sup> ~ 100cm <sup>2</sup> )                 |
| 1 | PS | N0178 | Split Thickness Skin Graft-Others (100cm <sup>2</sup> ~ 400cm <sup>2</sup> )                |
| 1 | PS | N0179 | Split Thickness Skin Graft-Others (400cm <sup>2</sup> ~ 900cm <sup>2</sup> )                |
| 1 | PS | N0249 | Release of Scar Contracture And Flap Operation                                              |
| 1 | PS | N0353 | Closed Reduction of Nasal Bone Fracture                                                     |
| 1 | PS | S0161 | Skin Flap-Local-Others                                                                      |
| 1 | PS | S0164 | Island Flap-Others                                                                          |
| 1 | PS | S0171 | Full Thickness Skin Graft (Face)-25cm <sup>2</sup> Below                                    |
| 1 | PS | S0173 | Full Thickness Skin Graft (Extremities)-25cm <sup>2</sup> Below                             |
| 1 | PS | S0175 | Full Thickness Skin Graft (Others)-25cm <sup>2</sup> Below                                  |
| 1 | PS | S0176 | Full Thickness Skin Graft (Others)-25cm <sup>2</sup> Over                                   |
| 1 | PS | SA161 | Free Flap-Others                                                                            |
| 1 | PS | SA164 | Free Composite Tissue Flap-Free Musculocutaneous Flap-Others                                |
| 1 | PS | SA165 | Free Omental Flap, Free Jejunal Flap-Others                                                 |
| 1 | PS | SB161 | Skin Flap-Local-Face                                                                        |
| 1 | PS | SB165 | Muscle Flap-Face                                                                            |
| 1 | PS | SB166 | Musculocutaneous Flap or Myocutaneous Flap-Face                                             |

|   |     |       |                                                                                             |
|---|-----|-------|---------------------------------------------------------------------------------------------|
| 1 | PS  | SB168 | Fasciocutaneous Flap-Face                                                                   |
| 1 | PS  | SB174 | Cadaveric Skin Graft (Others)-25cm <sup>2</sup> ~100cm <sup>2</sup>                         |
| 1 | PS  | SC161 | Free Flap-Face                                                                              |
| 1 | PS  | SC163 | Free Composite Tissue Flap-Free Tendocutaneous Flap-Face                                    |
| 1 | PS  | SC164 | Free Composite Tissue Flap-Free Musculocutaneous Flap-Face                                  |
| 1 | PS  | N0153 | Mohs Micrographicsurgery                                                                    |
| 1 | URO | R3191 | Transurethral Ureteral Dilatation-With Balloon                                              |
| 1 | URO | R3211 | Percutaneous Ureterolithotomy                                                               |
| 1 | URO | R3264 | Ureteral Stent Indwelling-Operative                                                         |
| 1 | URO | R3267 | Removal of Ureteral Stent-Cystoscopic                                                       |
| 1 | URO | R3424 | Flexible Ureterorenoscopic Stone Removal-Kidney                                             |
| 1 | URO | R3426 | Flexible Ureterorenoscopic Stone Removal-Ureter (Middle)                                    |
| 1 | URO | R3563 | Operation For Urinary Incontinence-Foreign Material Or Autologous Fat Injection             |
| 1 | URO | R3565 | Operation For Urinary Incontinence-Transvaginal Approach                                    |
| 1 | URO | R3566 | Operation of Artificial Urethral Sphincter-Removal of Artificial Urethral Sphincter         |
| 1 | URO | R3567 | Operation of Artificial Urethral Sphincter-Insertion of artificial urethral sphincter       |
| 1 | URO | R3663 | Urethroscopic Surgery-Urethral Stent Indwelling                                             |
| 1 | URO | R3665 | Urethroscopic Surgery-Urethrotomy                                                           |
| 1 | URO | R4060 | Excision of Bartholin'S Gland And Cyst                                                      |
| 1 | URO | RA166 | Urinary Fistulectomy-Between Bladder And Intestine                                          |
| 1 | URO | R3416 | Percutaneous Pyelostomy                                                                     |
| 1 | URO | R3216 | Ureteroscopy Ureterolithotomy-Upper                                                         |
| 1 | URO | R3218 | Ureteroscopy Ureterolithotomy-Lower                                                         |
| 1 | URO | R3381 | Renal Pelvis Instillation-By Ureteral Catheterization                                       |
| 1 | URO | R3440 | Ureterocutaneostomy                                                                         |
| 1 | URO | R3541 | Transurethral Bladder Surgery-Tumor (Simple)                                                |
| 1 | GS  | Q7680 | Colonoscopic Bleeding Control                                                               |
| 1 | GS  | Q7730 | Sigmoidoscopic Bleeding Control                                                             |
| 1 | GS  | Q7752 | Sigmoidoscopic Operation Of Rectosigmoidal Tumor-Mucosal Resection And Submucosal Resection |
| 1 | GS  | QX706 | Colonoscopic Operation of Colonic Tumor-Submucosal Dissection                               |
| 1 | GS  | N7133 | Mastectomy-Benign (Partial)                                                                 |
| 1 | GS  | N7137 | Mastectomy-Malignant (Partial)                                                              |
| 1 | GS  | P4551 | Total Thyroidectomy-Unilateral                                                              |
| 1 | GS  | P4553 | Subtotal Thyroidectomy-Unilateral                                                           |
| 1 | GS  | Q2755 | Operation of Inguinal Hernia (Others)-High Ligation                                         |
| 1 | GS  | Q2722 | Operation of Umbilical Hernia-Others                                                        |
| 1 | GS  | Q2756 | Operation of Inguinal Hernia (Others)-High Ligation And Posterior Repair                    |
| 1 | GS  | Q2757 | Operation of Femoral Hernia                                                                 |
| 1 | GS  | Q2871 | Operation of Internal Bowel Hernia-Reduction                                                |
| 1 | GS  | Q2881 | Operation of Periproctal Abscess (Superficial)-Incision And Drainage                        |

|   |     |       |                                                                                     |
|---|-----|-------|-------------------------------------------------------------------------------------|
| 1 | GS  | Q2883 | Operation of Periproctal Abscess-Deep                                               |
| 1 | GS  | QA753 | Operation of Recurrent Inguinal Hernia (With Resection of Intestine)-High Ligation  |
| 1 | GS  | QA756 | Operation of Recurrent Inguinal Hernia (Others)-High Ligation And Posterior Repair  |
| 1 | NS  | S4756 | CNS Stereotactic Operation-Biopsy, Aspiration, Excision of Lesion, Hematoma Removal |
| 1 | NS  | S0471 | Implantation of Intracranial Neurostimulator Electrodes                             |
| 1 | NS  | S0472 | Implantation of Electrical Stimulator                                               |
| 1 | NS  | S0474 | Exchange of Electrical Stimulator                                                   |
| 1 | NS  | S4741 | Endoscopic Brain Surgery-For Diagnosis                                              |
| 1 | NS  | S4722 | Repair of CSF Leakage-Intraspinal                                                   |
| 1 | NS  | M6599 | Percutaneous Cerebral Angioplasty with Drug                                         |
| 1 | OPH | S5191 | Incision of Orbital Abscess-Invasive                                                |
| 1 | OS  | N0233 | Removal of Subcutaneous Benign Tumor                                                |
| 1 | OS  | N0317 | Osteotomy-Metacarpal, Metatarsal, Finger, Toe                                       |
| 1 | OS  | N0606 | Closed Pinning[Metacarpal, Metatarsal, Finger, Toe]                                 |
| 1 | CS  | O1532 | Removal of Chest Wall Foreign Body (Others)                                         |
| 1 | DNT | U4841 | Open Reduction of Mandibular Fracture (Symphysis, Body, Angle of Mandible)          |
| 1 | DNT | U4940 | Arthroplasty of TMJ                                                                 |
| 1 | DNT | UX044 | TMJ Arthrocentesis                                                                  |
| 1 | ENT | P2113 | Neck Lymphatic Dissection-Unilateral (Modified Radical)                             |
| 1 | ENT | P2114 | Neck Lymphatic Dissection-Unilateral (Selective)                                    |
| 1 | ENT | P2118 | Neck Lymphatic Dissection-Bilateral                                                 |
| 1 | ENT | P2116 | Neck Lymphatic Dissection-Unilateral (Modified Radical)                             |
| 1 | ENT | P2117 | Neck Lymphatic Dissection-Unilateral (Selective)                                    |
| 1 | ENT | P2119 | Neck Lymphatic Dissection-Bilateral                                                 |
| 1 | URO | R3235 | Ureteroenterocutaneostomy-Incontinent                                               |
| 1 | URO | R3236 | Ureteroenterocutaneostomy-Continent                                                 |
| 1 | URO | R3600 | Bladder Neck Plasty                                                                 |
| 1 | URO | R3977 | Holmium Laser Enucleation of The Prostate (HoLEP)                                   |
| 2 | OPH | S5070 | Intravitreal Injection                                                              |
| 2 | OS  | N0922 | Fasciotomy, Simple                                                                  |
| 2 | OS  | N0923 | Fasciotomy, Complex                                                                 |
| 2 | OS  | N0041 | Escharectomy[9% Under]-Hand, Foot, Finger or Toe                                    |
| 2 | URO | R3515 | Transurethral Bladder Surgery-Coagulation of Bladder Lesion                         |
| 2 | URO | R3530 | Transurethral Resection of Bladder Neck                                             |
| 2 | URO | R3540 | Transurethral Bladder Surgery-Removal of Blood Clot In Bladder                      |
| 2 | URO | R3576 | Cystostomy-Percutaneous                                                             |
| 2 | URO | R3321 | Nephrostomy-Percutaneous                                                            |
| 2 | URO | R3192 | Percutaneous Ureteral Dilatation                                                    |
| 2 | CS  | Q2333 | Esophagostomy                                                                       |
| 2 | CS  | N0542 | Excision of Others                                                                  |
| 2 | CS  | O1485 | Resection of Chest Wall Tumor, Others (Benign)                                      |
| 2 | CS  | Q2352 | Repair of Hiatal Hernia-Abdominal Approach                                          |



|   |     |       |                                                                                                   |
|---|-----|-------|---------------------------------------------------------------------------------------------------|
| 2 | CS  | O0211 | Implantation of Cardioverter Defibrillator-Transvenous-Implantation of Cardioverter Defibrillator |
| 2 | CS  | O1530 | Reconstructive Repair of Pectus Excavatum (Ravitch Procedure), Carinatum                          |
| 2 | CS  | O1371 | Revision of Tracheostoma, Simple                                                                  |
| 2 | CS  | O1372 | Revision of Tracheostoma With Local Flap                                                          |
| 2 | DNT | U4533 | Surgery of Osteomyelitis of Mandible or Maxilla-Limited Alveolar Bone                             |
| 2 | DNT | U4534 | Surgery of Osteomyelitis of Mandible or Maxilla-One Side Mandible 1/3 Below                       |
| 2 | DNT | U4535 | Surgery of Osteomyelitis of Mandible or Maxilla-One Side Mandible 1/3 Over                        |
| 2 | DNT | U4456 | Intraoral Antiphlogosis-Abscess of Tongue or Mouth of Floor                                       |
| 2 | DNT | U4622 | Oroantral Fistula Closure with Pedicled Flap                                                      |
| 2 | ENT | S5711 | Decompression of Facial Nerve-Transauricular Approach                                             |
| 2 | ENT | S5750 | Petrosectomy                                                                                      |
| 2 | ENT | S5800 | Cochlear Implant                                                                                  |
| 2 | ENT | Q2231 | Removal of Parotid Tumor-Benign                                                                   |
| 2 | ENT | Q2291 | Excision of Oropharyngeal Benign Tumor                                                            |
| 2 | GS  | Q2613 | Gastrostomy (Invasive)-Transient                                                                  |
| 2 | GS  | Q2614 | Gastrostomy (Invasive)-Permanent                                                                  |
| 2 | GS  | Q2640 | Enterotomy                                                                                        |
| 2 | GS  | Q2861 | Appendectomy-Simple                                                                               |
| 2 | GS  | Q2863 | Appendectomy-Removal of Appendical Abscess With Periappendical Abscess Drainage                   |
| 2 | GS  | Q2862 | Appendectomy-Perforated                                                                           |
| 2 | GS  | Q2801 | Repair of Enteric Fistula-Loop                                                                    |
| 2 | GS  | Q2802 | Repair of Enteric Fistula-End                                                                     |
| 2 | GS  | Q2803 | Repair of Enteric Fistula-Double Barrel                                                           |
| 2 | GS  | Q2804 | Repair of Enteric Fistula-Reversal of Hartmann Procedure                                          |
| 2 | GS  | Q7390 | Cholecystostomy, Cholecystotomy                                                                   |
| 2 | GS  | O2011 | External AV Shunt For Hemodialysis                                                                |
| 2 | GS  | P4571 | Adrenalectomy-Unilateral                                                                          |
| 2 | GS  | Q2551 | Vagotomy (Truncal Vagotomy)-With Gastrojejunostomy or Pyloroplasty                                |
| 2 | GS  | Q2645 | Polypectomy of Small Bowel or Colon                                                               |
| 2 | GS  | Q2561 | Pyloroplasty (Fredet-Ramstedt Pyloromyotomy)                                                      |
| 2 | GS  | Q2562 | Pyloroplasty (Others)                                                                             |
| 2 | GS  | O2081 | Fistula Formation-Autologous Vein For Hemodialysis                                                |
| 2 | GS  | O2082 | Fistula Formation-Artificial Vein For Hemodialysis                                                |
| 2 | GS  | O2083 | Repair of Arterio-Venous Fistula For Hemodialysis                                                 |
| 2 | GY  | R4421 | Extirpation of Adnexal Tumor-Benign                                                               |
| 2 | GY  | R4148 | Hysterectomy (without Lymphadenectomy)-Abdominal approach-complex                                 |
| 2 | GY  | R0409 | Colporrhaphy-Anterior Colporrhaphy                                                                |
| 2 | GY  | R4070 | Extirpation of Vaginal Tumor-Benign                                                               |
| 2 | GY  | R4112 | Colpopexy (Surgical)-Vaginal Approach                                                             |
| 2 | GY  | R4157 | Pelvic And Para-Aortic Lymphadenectomy                                                            |
| 2 | GY  | R4130 | Subtotal Hysterectomy                                                                             |

|   |     |       |                                                                                          |
|---|-----|-------|------------------------------------------------------------------------------------------|
| 2 | GY  | R4143 | Hysterectomy (With Lymphadenectomy)-Simple                                               |
| 2 | GY  | R4202 | Vaginal Total Hysterectomy                                                               |
| 2 | GY  | R4203 | Vaginal Total Hysterectomy With A And P Repair                                           |
| 2 | CS  | M6521 | Percutaneous Atrial Septostomy-Balloon                                                   |
| 2 | CS  | OZ751 | Percutaneous Closure of Interatrial Septal Defect                                        |
| 2 | CS  | M6511 | Percutaneous Left Atrial Appendage Occlusion                                             |
| 2 | NS  | N1497 | Laminectomy, Cervical Spine                                                              |
| 2 | NS  | N1498 | Laminectomy, Thoracic Spine                                                              |
| 2 | NS  | N1499 | Laminectomy, Lumbar Spine                                                                |
| 2 | NS  | N2491 | Cervical Spine Laminoplasty                                                              |
| 2 | NS  | N2492 | Cervical Spine Laminoplasty                                                              |
| 2 | NS  | N2497 | Laminectomy, Cervical Spine                                                              |
| 2 | NS  | N2498 | Laminectomy, Thoracic Spine                                                              |
| 2 | NS  | N2499 | Laminectomy, Lumbar Spine                                                                |
| 2 | NS  | N0455 | Surgical removal of the ossification of spinal ligament (OLF removal-posterior approach) |
| 2 | OPH | S4900 | Enucleation                                                                              |
| 2 | OPH | S5220 | Enucleation and Tissue Implantation                                                      |
| 2 | OS  | N0685 | Arthrotomy For Acute Septic Joint[Elbow,Wrist,Ankle]                                     |
| 2 | OS  | N0688 | Arthrotomy For Acute Septic Joint[Elbow,Wrist,Ankle]                                     |
| 2 | OS  | N0686 | Arthrotomy For Acute Septic Joint[Finger,Toe]                                            |
| 2 | OS  | N0689 | Arthrotomy For Acute Septic Joint[Finger,Toe]                                            |
| 2 | OS  | N2072 | Replacement Arthroplasty-Total[Knee]                                                     |
| 2 | OS  | N2077 | Replacement Arthroplasty-Total[Knee]                                                     |
| 2 | OS  | N2712 | Replacement Arthroplasty-Hemiarthroplasty[Knee]                                          |
| 2 | OS  | N3715 | Revision of Total Arthroplasty[Ankle]                                                    |
| 2 | OS  | N0311 | Ostectomy                                                                                |
| 2 | OS  | N0312 | Bone Graft                                                                               |
| 2 | OS  | N0604 | Open Reduction of Fractured Extremity[Clavicle,Patella,Carpal Bone,Tarsal Bone]          |
| 2 | OS  | N0605 | Open Reduction of Fractured Extremity[Metacarpal,Metatarsal,Finger,Toe]                  |
| 2 | OS  | N0614 | Open Reduction of Fractured Extremity[Clavicle,Patella,Carpal Bone,Tarsal Bone]          |
| 2 | OS  | N0622 | Repair of Nonunion or Malunion[Humerus,Forearm,Tibia]                                    |
| 2 | OS  | N0703 | Excision of Joint[Including Synovectomy]-Elbow,Wrist,Ankle                               |
| 2 | OS  | N0704 | Excision of Joint[Including Synovectomy]-Finger,Toe                                      |
| 2 | OS  | N0708 | Excision of Joint[Including Synovectomy]-Elbow,Wrist,Ankle                               |
| 2 | OS  | N0710 | Excision of Joint [Including Synovectomy]-Knee                                           |
| 2 | OS  | N0723 | Resection Arthroplasty[Finger,Toe]                                                       |
| 2 | OS  | N0733 | Arthrodesis[Elbow,Wrist,Ankle]                                                           |
| 2 | OS  | N0734 | Arthrodesis[Finger,Toe]                                                                  |
| 2 | OS  | N0911 | Subcutaneous Tenotomy                                                                    |
| 2 | OS  | N0931 | Reconstruction of Tendon And Ligament, Simple                                            |
| 2 | OS  | N0932 | Reconstruction of Tendon And Ligament, Complex                                           |
| 2 | OS  | N0936 | Acromioplasty And Repair of Ruptured Shoulder Rotator Cuff (Primary Repair)              |

|   |     |       |                                                                                                          |
|---|-----|-------|----------------------------------------------------------------------------------------------------------|
| 2 | OS  | N0937 | Acromioplasty And Repair of Ruptured Shoulder Rotator Cuff (With Myoplasty And Tendoplasty)              |
| 2 | OS  | N0941 | Tenolysis                                                                                                |
| 2 | OS  | N0981 | External Fixation[Pelvis,Femur]                                                                          |
| 2 | OS  | N0982 | External Fixation[Humerus,Tibia]                                                                         |
| 2 | OS  | N0986 | External Fixation[Humerus,Tibia]                                                                         |
| 2 | OS  | N1584 | Vascularized Osteocutaneous Graft                                                                        |
| 2 | OS  | N1601 | Open Reduction of Fractured Extremity-Forearm (Radius)                                                   |
| 2 | OS  | N1604 | Open Reduction of Fractured Extremity-Crus (Tibia)                                                       |
| 2 | OS  | N1611 | Open Reduction of Fractured Extremity-Forearm (Radius)                                                   |
| 2 | OS  | N1612 | Open Reduction of Fractured Extremity-Forearm (Ulnar)                                                    |
| 2 | OS  | N1616 | Open Reduction of Fractured Extremity-Crus (Tibia and Fibula)                                            |
| 2 | OS  | S0165 | Muscle Flap-Others                                                                                       |
| 2 | OS  | S0166 | Musculocutaneous Flap or Myocutaneous Flap-Others                                                        |
| 2 | OS  | S0168 | Fasciocutaneous Flap-Others                                                                              |
| 2 | OS  | N2075 | Replacement Arthroplasty-Total[Ankle]                                                                    |
| 2 | OS  | N2078 | Replacement Arthroplasty-Total[Elbow]                                                                    |
| 2 | OS  | N0565 | Disarticulation of Extremities[Elbow, Wrist, Ankle]                                                      |
| 2 | OS  | N0566 | Disarticulation of Extremities[Finger, Toe]                                                              |
| 2 | OS  | N0582 | Revision of Amputated Stump (Need Osteoplasty)-Finger, Toe                                               |
| 2 | OS  | N0584 | Revision of Amputated Stump (Need Plastic Operation On Soft Tissue)-Finger, Toe                          |
| 2 | OS  | N0752 | Open Reduction of Dislocation[Shoulder]                                                                  |
| 2 | OS  | N0282 | Curettage or Excision of Benign Bone Tumor[Humerus, Forearm Bone, Clavicle]                              |
| 2 | OS  | N0581 | Revision of Amputated Stump (Need Osteoplasty)-Thigh, Lower Leg, Upper Arm, Forearm                      |
| 2 | OS  | N0583 | Revision of Amputated Stump (Need Plastic Operation On Soft Tissue)-Thigh, Lower Leg, Upper Arm, Forearm |
| 2 | OS  | N0844 | Drainage of Intramuscular Abscess (Others)                                                               |
| 2 | PS  | N0952 | Operation of Fractured Lower Jaw (Open Reduction)-Symphysis, Body, Angle of Mandible                     |
| 2 | PS  | N0152 | Wide Excision And Lymph Node Dissection                                                                  |
| 2 | URO | R3542 | Transurethral Bladder Surgery-Tumor (Complex)                                                            |
| 2 | URO | R3543 | Transurethral Bladder Surgery-Tumor (Highly Complex)                                                     |
| 2 | URO | R3290 | Partial Nephrectomy                                                                                      |
| 2 | URO | R3950 | Prostatectomy                                                                                            |
| 2 | URO | R3151 | Ureteroneocystostomy-Simple                                                                              |
| 2 | URO | R3154 | Ureteroneocystostomy-Using Bladder Flap                                                                  |
| 2 | URO | R3180 | End-To-End Ureteroureterostomy                                                                           |
| 2 | URO | R3231 | Uretero-Intestino-Vesical Anastomosis                                                                    |
| 2 | URO | R3421 | Operative Ureterolithotomy-Upper                                                                         |
| 2 | URO | R3620 | Repair of Cystocele                                                                                      |
| 2 | URO | R3683 | Repair of Urethral Stricture-Transpubic                                                                  |
| 2 | URO | R3720 | External Urethral Meatotomy                                                                              |
| 2 | URO | R3755 | Urethrectomy-Male                                                                                        |
| 2 | URO | R3756 | Urethrectomy-Female                                                                                      |

|   |     |       |                                                                                      |
|---|-----|-------|--------------------------------------------------------------------------------------|
| 2 | URO | R3770 | Removal of Urethral Caruncle                                                         |
| 2 | URO | R3896 | Operation of Vas Deferens-Vasectomy Or Ligation                                      |
| 2 | URO | R3400 | Pyeloplasty, Ureteroplasty                                                           |
| 2 | URO | R3433 | Ureterectomy-Removal of Remnant Ureter                                               |
| 2 | URO | R3461 | Cystotomy-Stone Or Foreign Body                                                      |
| 2 | URO | R3791 | Penectomy-Partial                                                                    |
| 2 | URO | R3792 | Penectomy-Total                                                                      |
| 2 | URO | R3851 | Orchiectomy-Total                                                                    |
| 2 | URO | R3853 | Orchiectomy-Partial                                                                  |
| 2 | URO | R3902 | Excision of Scrotum-Partial                                                          |
| 2 | GY  | R4427 | Extirpation of Adnexal Tumor (Malignant)-Simple                                      |
| 2 | NS  | N1466 | Arthrodesis of Spine-Lumbar Spine-Anterior Technique                                 |
| 2 | NS  | N1460 | Posterior Lumbar Interbody Fusion                                                    |
| 2 | NS  | N1469 | Arthrodesis of Spine-Lumbar Spine-Posterior Technique                                |
| 2 | NS  | N2468 | Arthrodesis of Spine-Cervical Spine-Posterior Technique[C1-2 Fixation]               |
| 2 | NS  | N0466 | Arthrodesis of Spine-Lumbar Spine-Anterior Technique                                 |
| 2 | NS  | N0469 | Arthrodesis of Spine-Lumbar Spine-Posterior Technique                                |
| 2 | NS  | N2463 | Arthrodesis of Spine-Cervical Spine-Anterior Technique[Others]                       |
| 2 | NS  | N2466 | Arthrodesis of Spine-Thoracic Spine-Anterior Technique[Others]                       |
| 2 | NS  | N0468 | Arthrodesis of Spine-Thoracic Spine-Posterior Technique                              |
| 2 | NS  | N2469 | Arthrodesis of Spine-Cervical Spine-Posterior Technique[Others]                      |
| 2 | NS  | N2470 | Posterior Lumbar Interbody Fusion                                                    |
| 2 | OS  | N0602 | Open Reduction of Fractured Extremity[Humerus,Scapula]                               |
| 2 | OS  | N0612 | Open Reduction of Fractured Extremity[Humerus,Scapula]                               |
| 2 | OS  | N3712 | Revision of Total Arthroplasty[Knee]                                                 |
| 2 | OS  | N3722 | Revision of Total Arthroplasty[Knee]                                                 |
| 2 | OS  | N4712 | Revision of hemiarthroplasty[Knee]                                                   |
| 2 | OS  | N4717 | Revision of hemiarthroplasty[Knee]                                                   |
| 2 | URO | R3975 | Transurethral Resection of Prostate                                                  |
| 2 | CS  | Q2341 | Suture of Esophagus-Cervical Approach                                                |
| 2 | CS  | Q2342 | Suture of Esophagus-Thoracic Approach                                                |
| 2 | DNT | U4861 | Partial Mandibulectomy                                                               |
| 2 | ENT | P2112 | Neck Lymphatic Dissection-Unilateral (Radical)                                       |
| 2 | ENT | P2115 | Neck Lymphatic Dissection-Unilateral (Radical)                                       |
| 2 | ENT | Q2201 | Removal of Tumor In Oral Cavity-Benign                                               |
| 2 | ENT | Q2181 | Operation for Malignant Tongue Tumor (Less Than One-Half Tongue)                     |
| 2 | GS  | Q7566 | Pancreatectomy-Wedge Resection                                                       |
| 2 | GY  | R4423 | Extirpation of Adnexal Tumor (Malignant)-Simple                                      |
| 2 | NS  | S4625 | Intracranial Foreign Body Removal                                                    |
| 2 | NS  | M6636 | Percutaneous Thrombus Removal-Mechanical thrombectomy (Intracranial vessel)          |
| 2 | NS  | M6637 | Percutaneous Thrombus Removal-Mechanical thrombectomy (Extracranial cervical vessel) |

|   |     |       |                                                                                                    |
|---|-----|-------|----------------------------------------------------------------------------------------------------|
| 2 | NS  | M6639 | Percutaneous Thrombus Removal-Mechanical thrombectomy (Others)                                     |
| 2 | NS  | S4709 | Excision of Extradural Tumor Or Lesion-Lumbar Spine-Without Pedicle And Vertebral Body             |
| 2 | NS  | S6696 | Excision of Intradural Tumor Or Lesion-Lumbar Spine                                                |
| 2 | OS  | N2071 | Replacement Arthroplasty-Total[Shoulder]                                                           |
| 2 | OS  | N2076 | Replacement Arthroplasty-Total[Shoulder]                                                           |
| 2 | OS  | N3716 | Revision of Total Arthroplasty[Shoulder]                                                           |
| 2 | OS  | N0701 | Excision of Joint[Including Synovectomy]-Hip                                                       |
| 2 | OS  | N0751 | Open Reduction of Dislocation[Hip]                                                                 |
| 2 | PS  | N0391 | Partial Maxillectomy                                                                               |
| 2 | PS  | N0404 | Partial Maxillectomy, Malignant Tumor                                                              |
| 2 | PS  | N0421 | Partial Mandibulectomy                                                                             |
| 2 | PS  | N0436 | Resection of Malignant Tumor (Partial Mandibulectomy)                                              |
| 2 | GS  | P4561 | Radical Operation of Malignant Thyroid Tumor                                                       |
| 2 | GY  | R4154 | Radical Hysterectomy With Bilateral Pelvic Lymphadenectomy (With Para-Aortic Lymph Node Biopsy)    |
| 2 | GY  | R4155 | Radical Hysterectomy With Bilateral Pelvic Lymphadenectomy (Without Para-Aortic Lymph Node Biopsy) |
| 2 | GY  | R4160 | Pelvic Adhesiolysis                                                                                |
| 2 | GY  | R4424 | Extirpation of Adnexal Tumor (Malignant)-Radical                                                   |
| 2 | GY  | R4428 | Extirpation of Adnexal Tumor (Malignant)-Radical                                                   |
| 2 | NS  | N0342 | Cranioplasty With Dura Graft                                                                       |
| 2 | NS  | N0347 | Cranioplasty-Complex                                                                               |
| 2 | URO | R3910 | Radical Hydrocelectomy                                                                             |
| 2 | GS  | OA633 | Angioplasty (End-to-End Anastomosis)-Others                                                        |
| 2 | GS  | OA638 | Angioplasty (With Patch Graft)-Others,Artificial Vessel                                            |
| 2 | GS  | OA639 | Angioplasty (With Patch Graft)-Others,Autologous Vessel                                            |
| 2 | GS  | Q7703 | Colonoscopic Operation Of Colonic Tumor-Mucosal Resection And Submucosal Resection                 |
| 2 | OS  | N0575 | Amputation of Extremities[Finger,Toe]                                                              |
| 2 | PS  | N0151 | Wide Excision of Skin Malignant Tumor                                                              |
| 2 | GS  | Q7430 | Excision of Ampulla of Vater & Replantation of Bile & Pancreatic Duct                              |
| 2 | OS  | N2070 | Total Arthroplasty[Hip]                                                                            |
| 2 | OS  | N0711 | Total Arthroplasty[Hip]                                                                            |
| 2 | OS  | N2710 | Hemiarthroplasty[Hip]                                                                              |
| 2 | OS  | N0715 | Hemiarthroplasty[Hip]                                                                              |
| 2 | URO | R3960 | Total Prostatoseminal Vesiculectomy                                                                |
| 2 | OS  | N1715 | Revision of Hemiarthroplasty[Hip]                                                                  |
| 2 | OS  | N1725 | Revision of Hemiarthroplasty[Hip]                                                                  |
| 2 | OS  | N1711 | Revision of Total Arthroplasty[Hip]                                                                |
| 2 | OS  | N1721 | Revision of Total Arthroplasty[Hip]                                                                |
| 2 | OS  | N3710 | Revision of Total Arthroplasty[Hip]                                                                |
| 2 | OS  | N3720 | Revision of Total Arthroplasty[Hip]                                                                |
| 2 | OS  | N4710 | Revision of Hemiarthroplasty[Hip]                                                                  |
| 2 | OS  | N4720 | Revision of Hemiarthroplasty[Hip]                                                                  |
| 2 | OS  | N0684 | Arthrotomy For Acute Septic Joint[Shoulder,Knee]                                                   |

|   |     |       |                                                                                               |
|---|-----|-------|-----------------------------------------------------------------------------------------------|
| 2 | ENT | Q2232 | Removal of Parotid Tumor-Malignant                                                            |
| 2 | GS  | Q2775 | Primary Repair of Mesentery                                                                   |
| 3 | GS  | M6690 | Percutaneous Cholecystostomy                                                                  |
| 3 | GS  | M6730 | Percutaneous Gastrostomy                                                                      |
| 3 | GS  | M6741 | Percutaneous Abscess Drainage                                                                 |
| 3 | GS  | M6750 | Percutaneous Drainage Catheter Exchange                                                       |
| 3 | GS  | Q2612 | Gastrostomy (Percutaneous)                                                                    |
| 3 | ENT | O1221 | Resection of Laryngeal Benign Tumor-Under Endoscopy-Under Suspension Laryngoscopy             |
| 3 | GS  | M6670 | Percutaneous Transhepatic Biliary Drainage                                                    |
| 3 | GS  | M6681 | Percutaneous Transhepatic Biliary Drainage With Ballooning Catheter                           |
| 3 | GS  | M6682 | Percutaneous Transhepatic Biliary Drainage With Stent                                         |
| 3 | CS  | O1510 | Closed Thoracostomy                                                                           |
| 3 | CS  | O2005 | Transcutaneous Cardiac Pacing                                                                 |
| 3 | CS  | O1571 | Closure of Sternotomy Separation                                                              |
| 3 | ENT | P2102 | Excision of Cervical Lymph Node-Superficial                                                   |
| 3 | ENT | P2103 | Excision of Cervical Lymph Node-Deep                                                          |
| 3 | GS  | Q2810 | Adhesiolysis                                                                                  |
| 3 | GS  | Q2680 | Intestinal Anastomosis                                                                        |
| 3 | GS  | Q2753 | Operation of Inguinal Hernia (With Resection of Intestine)-High Ligation                      |
| 3 | GS  | Q2731 | Operation of Incisional Hernia-With Resection of Intestine                                    |
| 3 | GS  | Q2732 | Operation of Incisional Hernia-Others                                                         |
| 3 | GS  | Q2754 | Operation of Inguinal Hernia (With Resection of Intestine)-High Ligation And Posterior Repair |
| 3 | GS  | Q2791 | Enterostomy-Tube                                                                              |
| 3 | GS  | Q2792 | Enterostomy-Loop                                                                              |
| 3 | GS  | Q2793 | Enterostomy-End                                                                               |
| 3 | GS  | Q2794 | Enterostomy-Double Barrel                                                                     |
| 3 | GS  | Q2796 | Enterostomy-Revision of Ileostomy or Colostomy (Revision of loop ileostomy)                   |
| 3 | GS  | Q2797 | Enterostomy-Revision of Ileostomy or Colostomy (Revision of loop colostomy)                   |
| 3 | GS  | Q2798 | Enterostomy-Revision of Ileostomy or Colostomy (Revision of End ileostomy or End colostomy)   |
| 3 | GS  | Q7380 | Cholecystectomy                                                                               |
| 3 | GS  | O2073 | Vessel Ligation Others                                                                        |
| 3 | GS  | O2074 | Vessel Ligation Others                                                                        |
| 3 | OS  | N0232 | Removal of Malignant Tumor                                                                    |
| 3 | URO | R3271 | Nephrectomy-Simple                                                                            |
| 3 | URO | R3571 | Cystostomy-Operative                                                                          |
| 3 | URO | R3470 | Partial Cystectomy                                                                            |
| 3 | URO | R3920 | Incision of Scrotal Abscess                                                                   |
| 3 | CS  | O1610 | Repair of Diaphragmatic Hernia                                                                |
| 3 | CS  | N0550 | Radical Curettage of Thoracic Cold Abscess                                                    |
| 3 | CS  | O1562 | Sternum Resection And Reconstruction                                                          |
| 3 | CS  | O1600 | Repair of Diaphragm                                                                           |
| 3 | CS  | Q2424 | Esophageal Diverticulectomy-Thoracic Approach                                                 |

|   |     |       |                                                                                                      |
|---|-----|-------|------------------------------------------------------------------------------------------------------|
| 3 | CS  | O1520 | Open Thoracostomy                                                                                    |
| 3 | ENT | S5592 | Excision of External Auditory Canal Tumor-Malignant                                                  |
| 3 | GS  | Q2710 | Intestinal Plication                                                                                 |
| 3 | GS  | Q2510 | Gastrotomy                                                                                           |
| 3 | NS  | M1661 | Embolization-Cerebral/Aneurysm/Assisted                                                              |
| 3 | NS  | M1662 | Embolization-Cerebral/Aneurysm/Others                                                                |
| 3 | NS  | M6601 | Percutaneous Intravascular Installation of Metallic Stent-Cerebral                                   |
| 3 | NS  | M6602 | Percutaneous Intravascular Installation of Metallic Stent-Carotid                                    |
| 3 | OS  | N0574 | Amputation of Extremities[Hand,Foot]                                                                 |
| 3 | OS  | N0591 | Open Reduction of Fracture and Dislocation of Spine or Pelvis-Spine                                  |
| 3 | OS  | N0601 | Open Reduction of Fractured Extremity[Femur]                                                         |
| 3 | OS  | N0611 | Open Reduction of Fractured Extremity[Femur]                                                         |
| 3 | NS  | M1665 | Embolization-Cerebral/Arteriovenous Malformation/Dural Arteriovenous Fistula/Transvenous             |
| 3 | NS  | M1666 | Embolization-Cerebral/Arteriovenous Malformation/Carotidocavernous Fistula                           |
| 3 | NS  | M1675 | Embolization-Tumor/Spinal                                                                            |
| 3 | OS  | N0022 | Operation of Osteomyelitis or Bone Abscess[Drilling, Fenestration Etc]-Humerus,Forearm Bone,Clavicle |
| 3 | OS  | N0023 | Operation of Osteomyelitis or Bone Abscess[Drilling, Fenestration, Saucerization Etc]-Others         |
| 3 | OS  | N0025 | Operation of Osteomyelitis or Bone Abscess[Drilling, Fenestration Etc]-Humerus,Forearm Bone,Clavicle |
| 3 | OS  | N0026 | Operation of Osteomyelitis or Bone Abscess[Drilling, Fenestration, Saucerization Etc]-Others         |
| 3 | OS  | N0021 | Operation of Osteomyelitis or Bone Abscess[Drilling, Fenestration Etc]-Pelvis,Femur,Tibia            |
| 3 | URO | R3241 | Augmentation Enterocystoplasty                                                                       |
| 3 | URO | R3482 | Total Cystectomy-Others                                                                              |
| 3 | URO | R3273 | Nephrectomy-Radical                                                                                  |
| 3 | ENT | Q2182 | Operation for Malignant Tongue Tumor-Hemiglossectomy                                                 |
| 3 | ENT | Q2203 | Removal of Tumor In Oral Cavity-Malignant                                                            |
| 3 | CS  | O1401 | Wedge Resection of Lung, Single                                                                      |
| 3 | GS  | O0161 | Vascular Bypass Operation (Femoral-Femoral, Clavicle-Clavicle Or Axilla-Axilla),Autologous Vessel    |
| 3 | GS  | O0162 | Vascular Bypass Operation (Femoral-Femoral, Clavicle-Clavicle Or Axilla-Axilla),Artificial Vessel    |
| 3 | GS  | O0163 | Vascular Bypass Operation (Femoral-Popliteal[Above Knee Joint]),Autologous Vessel                    |
| 3 | GS  | O0164 | Vascular Bypass Operation (Femoral-Popliteal[Knee Joint Upper]),Artificial Vessel                    |
| 3 | GS  | O0166 | Vascular Bypass Operation (Femoral-Popliteal[Below Knee Joint]),Artificial Vessel                    |
| 3 | GS  | Q2490 | Incision And Drainage of Subphrenic Abscess                                                          |
| 3 | GS  | P2094 | Splenorrhaphy                                                                                        |
| 3 | CS  | M6620 | Percutaneous Intravascular Installation of Metallic Stent-Percutaneous Intravascular Atherectomy     |
| 3 | CS  | M6597 | Percutaneous Transluminal Angioplasty-Others                                                         |
| 3 | CS  | M6613 | Percutaneous Intravascular Installation of Stent Graft-Others                                        |

|   |     |       |                                                                                               |
|---|-----|-------|-----------------------------------------------------------------------------------------------|
| 3 | NS  | S4705 | Excision of Extradural Tumor Or Lesion-Cervical Spine-Without Pedicle And Vertebral Body      |
| 3 | NS  | S6692 | Excision of Intradural Tumor Or Lesion-Cervical Spine                                         |
| 3 | NS  | S4706 | Excision of Extradural Tumor Or Lesion-Thoracic Spine-Involving Pedicle And/Or Vertebral Body |
| 3 | OS  | N0680 | Arthrotomy For Acute Septic Joint[Hip]                                                        |
| 3 | OS  | N0681 | Arthrotomy For Acute Septic Joint[Hip]                                                        |
| 4 | URO | R3432 | Ureterectomy-Total Nephroureterectomy                                                         |
| 4 | GS  | Q2691 | Operation for Intestinal Obstruction-Including Resection of Intestine                         |
| 4 | GS  | Q2692 | Operation for Intestinal Obstruction-Entero-Enterostomy                                       |
| 4 | GS  | Q2693 | Operation for Intestinal Obstruction-Adhesiolysis                                             |
| 4 | GS  | Q7310 | Choledochotomy And Choledocholithotomy                                                        |
| 4 | CS  | M6632 | Percutaneous Thrombus Removal-Thrombolysis-Others                                             |
| 4 | URO | R3251 | Intestinal Substitute of Bladder                                                              |
| 4 | URO | R3272 | Donor Nephrectomy                                                                             |
| 4 | URO | R3550 | Repair of Bladder Rupture                                                                     |
| 4 | CS  | O1605 | Excision of Diaphragmatic Tumor And Reconstruction                                            |
| 4 | CS  | O1645 | Vascular Bypass Operation (Artery-Others),Autologous Vessel                                   |
| 4 | CS  | O1646 | Vascular Bypass Operation (Artery-Others),Artificial Vessel                                   |
| 4 | CS  | O1581 | Mediastinostomy, Collor's                                                                     |
| 4 | CS  | O2035 | Resection of Aneurysm-Others                                                                  |
| 4 | CS  | O2037 | Resection of Aneurysm-Iliac Artery (Bilateral)                                                |
| 4 | CS  | O2038 | Resection of Aneurysm-Iliac Artery (Unilateral)                                               |
| 4 | CS  | O1486 | Resection of Chest Wall Tumor, Others (Malignant)                                             |
| 4 | CS  | O1484 | Resection of Chest Wall Tumor With Reconstruction of Chest Wall (Malignant)                   |
| 4 | DNT | U4465 | Extraoral Antiphlogosis-Deep Layer                                                            |
| 4 | DNT | U4812 | Total Maxillectomy, Malignant Tumor                                                           |
| 4 | ENT | O1251 | Total Laryngectomy And Hypopharyngectomy                                                      |
| 4 | ENT | O1252 | Total Laryngectomy And Partial Hypopharyngectomy                                              |
| 4 | ENT | Q2251 | Incision of Retropharyngeal Abscess-Intraoral                                                 |
| 4 | ENT | Q2252 | Incision of Retropharyngeal Abscess-Transcervical                                             |
| 4 | ENT | O0962 | Extirpation of Malignant Tumor of Nasal or Paranasal Sinuses (Radical Maxillectomy)           |
| 4 | GS  | Q2762 | Excision of Mesenteric Tumor-Others                                                           |
| 4 | GS  | Q2502 | Excision of Retroperitoneal Tumor-Malignant or Pheochromocytoma                               |
| 4 | GS  | P2091 | Splenectomy-Total                                                                             |
| 4 | GS  | Q7221 | Hepatectomy-Wedge Resection                                                                   |
| 4 | GS  | O2064 | Transluminal Atherectomy-Abdominal Artery or Iliac Artery                                     |
| 4 | GS  | O2067 | Transluminal Atherectomy-Abdominal Artery or Iliac Artery                                     |
| 4 | GS  | Q0257 | Subtotal Gastrectomy (Wedge Resection)                                                        |
| 4 | GS  | O2072 | Vessel Ligation Following Laparotomy                                                          |
| 4 | GS  | Q7563 | Subtotal Pancreatectomy                                                                       |
| 4 | GS  | Q7565 | Distal Pancreatectomy                                                                         |
| 4 | GS  | OA632 | Angioplasty (End-to-End Anastomosis)-By Laparotomy                                            |



|   |     |       |                                                                                                           |
|---|-----|-------|-----------------------------------------------------------------------------------------------------------|
| 4 | GS  | OA636 | Angioplasty (With Patch Graft)-By Laparotomy,Artificial Vessel                                            |
| 4 | GS  | OA637 | Angioplasty (With Patch Graft)-By Laparotomy,Autologous Vessel                                            |
| 4 | GS  | Q2673 | Colectomy-Segmental Resection                                                                             |
| 4 | GS  | QA673 | Colectomy-Segmental Resection                                                                             |
| 4 | GS  | QA679 | Colectomy With Proximal Colostomy And Distal Stump                                                        |
| 4 | GS  | QA921 | Rectal And Sigmoid Resection-Anterior Resection                                                           |
| 4 | GS  | QA922 | Rectal And Sigmoid Resection-Low Anterior Resection                                                       |
| 4 | GS  | QA923 | Rectal And Sigmoid Resection[A-P Resection (Mile's Operation) or A-S Resection]                           |
| 4 | GS  | Q2892 | Resection of Rectal Tumor-Abdominal Approach                                                              |
| 4 | GS  | Q2921 | Rectal And Sigmoid Resection-Anterior Resection                                                           |
| 4 | GS  | Q2922 | Rectal And Sigmoid Resection-Low Anterior Resection                                                       |
| 4 | GS  | Q2923 | Rectal And Sigmoid Resection[A-P Resection (Mile's Operation) or A-S Resection]                           |
| 4 | GS  | QA928 | Rectal and Sigmoid Resection-Ultra-Low anterior resection                                                 |
| 4 | GS  | Q2481 | Peritoneal Lavage                                                                                         |
| 4 | GS  | Q2540 | Simple Closure of Perforated Stomach or Duodenum                                                          |
| 4 | GY  | R4156 | Pelvic Exenteration                                                                                       |
| 4 | CS  | M6605 | Percutaneous Intravascular Installation of Metallic Stent-<br>Others                                      |
| 4 | GS  | O2065 | Transluminal Atherectomy-Others                                                                           |
| 4 | GS  | O2068 | Transluminal Atherectomy-Others                                                                           |
| 4 | NS  | S4711 | Shunt Operation Or Bypass Operation-<br>Subdural/Subarachnoid-Other                                       |
| 4 | NS  | S4712 | Shunt Operation Or Bypass Operation-Ventriculo-Other                                                      |
| 4 | NS  | S4801 | Operation of Skull Base-Anterior Cranial Fossa                                                            |
| 4 | NS  | N0321 | Burr Hole or Trephination For Exploration                                                                 |
| 4 | NS  | N0322 | Burr Hole or Trephination For Drainage And/Or Evacuation of<br>Cyst,Hematoma or Abscess (Sub or Epidural) |
| 4 | NS  | N0323 | Burr Hole or Trephination For Drainage And/Or Evacuation of<br>Cyst,Hematoma or Abscess (Intracerebral)   |
| 4 | NS  | N0324 | Burr Hole or Trephination For Others                                                                      |
| 4 | URO | R3481 | Total Cystectomy-Radical                                                                                  |
| 4 | NS  | N0451 | Vertebral Corpectomy (Cervical Spine)                                                                     |
| 4 | NS  | N0453 | Vertebral Corpectomy (Lumbar Spine)                                                                       |
| 4 | NS  | M6644 | Embolization-Others                                                                                       |
| 4 | NS  | S4661 | Intracerebral Vascular Anastomosis-Direct                                                                 |
| 4 | NS  | N0452 | Vertebral Corpectomy (Thoracic Spine)                                                                     |
| 5 | GS  | Q2440 | Diagnostic Exploratory Laparotomy                                                                         |
| 5 | CS  | O1502 | Irrigation of Empyema Cavity                                                                              |
| 5 | CS  | O1981 | Resection of Atrial Myxoma                                                                                |
| 5 | CS  | O1982 | Resection of Cardiac Tumor-Others                                                                         |
| 5 | CS  | O1596 | Mediasternal Lymph Node Dissection                                                                        |
| 5 | CS  | O1597 | Mediasternal Lymph Node Dissection                                                                        |
| 5 | CS  | O1591 | Excision of Mediastinal Benign Tumor                                                                      |
| 5 | CS  | O1410 | Segmentectomy of Lung                                                                                     |
| 5 | CS  | O1586 | Mediastinostomy By Thoracotomy                                                                            |

|   |     |       |                                                                                  |
|---|-----|-------|----------------------------------------------------------------------------------|
| 5 | CS  | O1336 | Removal of Tracheal or Bronchial Foreign Body By Thoracotomy                     |
| 5 | CS  | O2004 | Implantation of Internal Pulse Generator By Thoracotomy                          |
| 5 | CS  | O1321 | Tracheal or Bronchial Repair, Cervical Approach                                  |
| 5 | CS  | O2006 | Operation of Arrhythmia-Supraventricular Arrhythmia                              |
| 5 | CS  | M6542 | Conventional Radiofrequency Ablation of Atrial fibrillation                      |
| 5 | CS  | M6545 | Conventional Radiofrequency Ablation of Atrial fibrillation with Septal Puncture |
| 5 | CS  | O1440 | Repair of Lung                                                                   |
| 5 | ENT | O1224 | Resection of Laryngeal Malignant Tumor (Corpectomy)                              |
| 5 | ENT | O1225 | Partial Laryngectomy (Vertical, Supraglottic)                                    |
| 5 | ENT | O1227 | Resection of Laryngeal Malignant Tumor (Total Laryngectomy)                      |
| 5 | ENT | Q2292 | Operation for Pharyngeal Malignant Tumor (Oropharyngeal)-Simple Resection        |
| 5 | ENT | Q2293 | Operation for Pharyngeal Malignant Tumor (Oropharyngeal)-Composite Resection     |
| 5 | ENT | Q2294 | Operation for Pharyngeal Malignant Tumor-Partial Hypopharyngectomy               |
| 5 | ENT | O1300 | Invasive Tracheostomy                                                            |
| 5 | ENT | O0226 | Transluminal Atherectomy-Carotid Artery (Simple)                                 |
| 5 | ENT | O0227 | Transluminal Atherectomy-Carotid Artery (Complex)                                |
| 5 | ENT | O2066 | Transluminal Atherectomy-Carotid Artery                                          |
| 5 | GS  | Q7410 | Radical Cholecystectomy of GB Cancer                                             |
| 5 | GS  | Q0251 | Subtotal Gastrectomy (Partial)                                                   |
| 5 | GS  | Q0252 | Subtotal Gastrectomy (Distal)                                                    |
| 5 | GS  | Q0253 | Subtotal Gastrectomy (Distal)                                                    |
| 5 | GS  | Q0258 | Subtotal Gastrectomy (Proximal Resection)                                        |
| 5 | GS  | Q0259 | Subtotal Gastrectomy                                                             |
| 5 | GS  | Q2598 | Subtotal Gastrectomy (Proximal Resection)                                        |
| 5 | GS  | Q2594 | Subtotal Gastrectomy (Partial)                                                   |
| 5 | GS  | O2045 | Inferior Vena Cava Filter Placement                                              |
| 5 | GS  | Q2671 | Right or Left Hemicolectomy                                                      |
| 5 | GS  | Q1261 | Colectomy-Subtotal                                                               |
| 5 | GS  | Q1262 | Colectomy-Subtotal                                                               |
| 5 | GS  | QA671 | Right or Left Hemicolectomy                                                      |
| 5 | GS  | Q7222 | Hepatectomy-Segmentectomy                                                        |
| 5 | GS  | Q7225 | Hepatectomy-Bisegmentectomy                                                      |
| 5 | GS  | Q2650 | Resection of Small Intestine                                                     |
| 5 | GS  | Q2651 | Resection of Small Intestine                                                     |
| 5 | GS  | Q7561 | Pancreatectomy-Total                                                             |
| 5 | GS  | Q7592 | Pancreaticoenterostomy (End-to-End Anastomosis)                                  |
| 5 | GS  | Q7351 | Choledochoduodenostomy                                                           |
| 5 | GS  | Q7352 | Choledochojejunostomy[Roux-en-Y]                                                 |
| 5 | GS  | Q2572 | Gastrojejunostomy                                                                |
| 5 | GS  | Q2573 | Gastrojejunostomy[Roux-En-Y]                                                     |
| 5 | GS  | Q2771 | Repair of Bowel And Mesenteric Injury-With Resection of Intestine                |
| 5 | GS  | Q2773 | Serosal Repair or Primary Repair of Perforated Intestine                         |

|   |     |       |                                                                           |
|---|-----|-------|---------------------------------------------------------------------------|
| 5 | GS  | Q2601 | Esophagojejunostomy                                                       |
| 5 | CS  | M6595 | Percutaneous Transluminal Angioplasty-Aortic                              |
| 5 | CS  | M6603 | Percutaneous Intravascular Installation of Metallic Stent-Aortic          |
| 5 | CS  | M6611 | Percutaneous Intravascular Installation of Stent Graft-Aortic             |
| 5 | CS  | M6612 | Percutaneous Intravascular Installation of Stent Graft-Aortic And Iliac   |
| 5 | CS  | M6551 | Percutaneous Transluminal Coronary Angioplasty-Single Vessel              |
| 5 | CS  | M6561 | Percutaneous Transcatheter Placement of Intracoronary Stent-Single Vessel |
| 5 | NS  | S4636 | Craniotomy for Excision of Brain Tumor-Infratentorial-Simple              |
| 5 | NS  | S4641 | Cerebral Aneurysm-Simple                                                  |
| 5 | NS  | S4642 | Cerebral Aneurysm-Complex                                                 |
| 5 | OS  | N0562 | Disarticulation of Extremities[Hip]                                       |
| 5 | OS  | N0573 | Amputation of Extremities[Upper Arm,Forearm,Lower Leg]                    |
| 6 | CS  | O1360 | Exploratory Thoracotomy                                                   |
| 6 | GS  | Q7342 | Radical Resection of Bile Duct-Malignant                                  |
| 6 | CS  | O1592 | Excision of Mediastinal Malignant Tumor                                   |
| 6 | CS  | O1841 | Repair of Arteriovenous Malformation-By Thoracotomy                       |
| 6 | CS  | O2071 | Vessel Ligation Following Thoracotomy                                     |
| 6 | CS  | OA631 | Angioplasty (End-to-End Anastomosis)-By Thoracotomy                       |
| 6 | CS  | OA634 | Angioplasty (With Patch Graft)-By Thoracotomy,Artificial Vessel           |
| 6 | CS  | OA635 | Angioplasty (With Patch Graft)-By Thoracotomy,Autologous Vessel           |
| 6 | CS  | O1421 | Single Lobectomy of Lung                                                  |
| 6 | CS  | O1422 | Bilobectomy of Lung                                                       |
| 6 | CS  | O1660 | Repair of Cardiac Wound                                                   |
| 6 | CS  | O1480 | Pleurodesis                                                               |
| 6 | CS  | O1460 | Apicolysis, Pleurolysis                                                   |
| 6 | CS  | O1932 | Creation of Pericardial Window-by Thoracotomy                             |
| 6 | CS  | O1935 | Creation of Pericardial Window-by Microscopy                              |
| 6 | CS  | O1931 | Pericardiostomy                                                           |
| 6 | ENT | O2055 | Thrombectomy (Artery),Neck                                                |
| 6 | GS  | Q2925 | Total Coloproctectomy (With Ileostomy)                                    |
| 6 | GS  | Q2533 | Total Gastrectomy-Abdominal Approach                                      |
| 6 | GS  | Q2536 | Total Gastrectomy-Abdominal Approach                                      |
| 6 | GS  | Q7223 | Hepatectomy-Lobectomy                                                     |
| 6 | GS  | O0281 | Removal of Infected Graft-Others                                          |
| 6 | GS  | Q7224 | Hepatectomy-Trisegmentectomy                                              |
| 6 | GS  | QA925 | Total Coloproctectomy (With Ileostomy)                                    |
| 6 | GS  | Q2672 | Colectomy-Total                                                           |
| 6 | GS  | QA672 | Colectomy-Total                                                           |
| 6 | GS  | Q2679 | Colectomy With Proximal Colostomy And Distal Stump                        |
| 6 | GS  | O2054 | Thrombectomy (Artery),Abdomen                                             |
| 6 | GS  | O0218 | Thrombectomy (Deep Vein),Lower Extremity                                  |
| 6 | GS  | O2058 | Thrombectomy (Deep Vein),Abdomen                                          |

|   |     |       |                                                                                                      |
|---|-----|-------|------------------------------------------------------------------------------------------------------|
| 6 | GS  | Q7572 | Pancreaticoduodenectomy-Pylorus-Preserving Operation                                                 |
| 6 | GS  | Q7571 | Pancreaticoduodenectomy-Whipple'S Operation                                                          |
| 6 | CS  | M6650 | Percutaneous Installation of Inferior Vena Cava Filter                                               |
| 6 | CS  | M6531 | Percutaneous Valvuloplasty-Mitral Valve                                                              |
| 6 | CS  | M6532 | Percutaneous Valvuloplasty-Aortic Valve                                                              |
| 6 | CS  | M6580 | Transcatheter Aortic Valve Implantation-Transapical Approach                                         |
| 6 | CS  | M6581 | Transcatheter Aortic Valve Implantation-Transaortic Approach                                         |
| 6 | CS  | M6582 | Transcatheter Aortic Valve Implantation-Transfemoral, Transsubclavian Approach                       |
| 6 | GS  | O2056 | Thrombectomy (Artery),Others                                                                         |
| 6 | GS  | O2059 | Thrombectomy (Deep Vein),Others                                                                      |
| 6 | NS  | S4635 | Craniotomy for Excision of Brain Tumor-Supratentorial-Complex                                        |
| 6 | NS  | S4621 | Craniotomy for Evacuation of Hematoma-Subdural Or Extradural                                         |
| 6 | NS  | S4622 | Craniotomy for Evacuation of Hematoma-Intracerebral                                                  |
| 6 | NS  | N0331 | Craniotomy or Craniectomy For Exploration                                                            |
| 6 | NS  | N0334 | Craniotomy or Craniectomy For Excision of Cranial Lesion or Benign Tumor                             |
| 6 | URO | R3280 | Renal Transplantation                                                                                |
| 7 | GS  | Q7230 | Hepatopancreaticoduodenectomy                                                                        |
| 7 | GS  | Q2445 | Damage Control Laparotomy                                                                            |
| 7 | CS  | O0173 | Vascular Bypass Operation (Aorto to carotid and subclavian artery)                                   |
| 7 | CS  | O2034 | Resection of Aneurysm-Abdominal Aorta And Iliac Artery                                               |
| 7 | CS  | O1431 | Pneumonectomy                                                                                        |
| 7 | CS  | Q2402 | Curative Operation of Esophageal Malignant Tumor-Thoracic And Abdominal Approach                     |
| 7 | CS  | Q2403 | Curative Operation of Esophageal Malignant Tumor-Cervical, Thoracic And Abdominal Approach           |
| 7 | CS  | O1521 | Pericardiocentesis with Redo-sternotomy                                                              |
| 7 | CS  | Q2362 | Esophageal Bypass Reconstruction-Thoracic And Abdominal Approach                                     |
| 7 | CS  | Q2366 | Esophageal Reconstruction After Resection-With Stomach                                               |
| 7 | CS  | Q2367 | Esophageal Reconstruction After Resection-With Jejunum                                               |
| 7 | GS  | O0224 | Resection of Aneurysm-Abdominal Aorta (Infrarenal)                                                   |
| 7 | OS  | N0572 | Amputation of Extremities[Thigh]                                                                     |
| 7 | CS  | O1644 | Vascular Bypass Op (Aorta-Renal,Thoracic,Abdominal Aorta-Femoral,Aorta-Splanchnic),Artificial Vessel |
| 7 | CS  | OA640 | Vascular Bypass Operation (Aorta-Coronary)-Simple (Off Pump CABG)                                    |
| 7 | CS  | OA641 | Vascular Bypass Operation (Aorta-Coronary),Simple                                                    |
| 7 | CS  | OA648 | Vascular Bypass Operation (Aorta-Coronary)-Simple (Off Pump CABG)                                    |
| 7 | CS  | OA649 | Vascular Bypass Operation (Aorta-Coronary)-Simple (Off Pump CABG)                                    |
| 7 | CS  | O1640 | Vascular Bypass Operation (Aorta-Coronary)-Simple                                                    |
| 7 | CS  | O1641 | Vascular Bypass Operation (Aorta-Coronary),Simple                                                    |
| 7 | CS  | O1648 | Vascular Bypass Operation (Aorta-Coronary)-Simple                                                    |
| 7 | CS  | O1649 | Vascular Bypass Operation (Aorta-Coronary)-Simple                                                    |

|   |    |       |                                                                   |
|---|----|-------|-------------------------------------------------------------------|
| 7 | CS | O1781 | Valvuloplasty-Tricuspid Valve                                     |
| 7 | CS | O1782 | Valvuloplasty-Mitral Valve                                        |
| 7 | CS | O1783 | Valvuloplasty-Aortic Valve                                        |
| 7 | CS | O1791 | Valve Replacement-Tricuspid Valve                                 |
| 7 | CS | O1792 | Valve Replacement-Mitral Valve                                    |
| 7 | CS | O1793 | Valve Replacement-Aortic Valve                                    |
| 7 | CS | O1799 | Sutureless Aortic Valve Replacement                               |
| 8 | CS | OA647 | Vascular Bypass Operation (Aorta-Coronary),Complex                |
| 8 | CS | O1647 | Vascular Bypass Operation (Aorta-Coronary),Complex                |
| 8 | CS | O1794 | Reoperation of Valvuloplasty-Tricuspid Valve                      |
| 8 | CS | O1795 | Reoperation of Valvuloplasty-Mitral Valve                         |
| 8 | CS | O1796 | Reoperation of Valvuloplasty-Aortic Valve                         |
| 8 | CS | O1823 | Left Ventricular Aneurysmectomy                                   |
| 8 | CS | O1825 | Left Ventricular Outflow Track Augmentation                       |
| 8 | CS | O1950 | Pulmonary Artery Embolectomy                                      |
| 8 | GS | Q8040 | Liver Transplantation from Cadaver Donor-Total                    |
| 8 | GS | O0223 | Resection of Aneurysm-Abdominal Aorta<br>(Suprarenal[Juxtarenal]) |
| 8 | CS | O1722 | Operation of Ventricular Septal Defect-Post Infarction            |
| 8 | CS | O2031 | Resection of Aneurysm-Ascending Aorta                             |
| 8 | CS | O2032 | Resection of Aneurysm-Aortic Arch                                 |
| 8 | CS | O2033 | Resection of Aneurysm-Descending Thoracic Aorta                   |
| 8 | NS | N0333 | Craniotomy or Craniectomy For Decompression                       |

OG, Operation Group; GS, General Surgery; CS, Cardiothoracic Surgery; OS, Orthopedic surgery; URO, Urology; OPH, ophthalmic surgery; NS, Neuro-Surgery; ENT, Ear, Nose and Throat surgery; PS, Plastic Surgery; GY, Gynecologic surgery; DNT, Dental Surgery.

**Table S2. Univariate and multivariable regression analysis model for 90-day mortality in the development cohort**

|                 | Univariate analysis |                | Estimate | Multivariable analysis |                |
|-----------------|---------------------|----------------|----------|------------------------|----------------|
|                 | OR (95% CI)         | <i>P</i> value |          | OR (95% CI)            | <i>P</i> value |
| Age, years      | 1.02 (0.98-1.06)    | 0.400          | 0.037    | 1.04 (1.00-1.08)       | 0.083          |
| Male            | 1.12 (0.79-1.58)    | 0.535          | 0.062    | 1.06 (0.74-1.53)       | 0.739          |
| HFRS            |                     |                |          |                        |                |
| 0               | 1 (reference)       |                |          | 1 (reference)          |                |
| 1-4             | 1.44 (0.98-2.11)    | 0.067          | 0.436    | 1.55 (1.04-2.31)       | 0.033          |
| ≥ 5             | 2.18 (1.34-3.54)    | 0.002          | 0.724    | 2.06 (1.23-3.45)       | 0.006          |
| Operation Group |                     |                |          |                        |                |
| Group 1         | 1 (reference)       |                |          | 1 (reference)          |                |
| Group 2         | 1.55 (0.65-3.71)    | 0.326          | 0.329    | 1.39 (0.58-3.35)       | 0.464          |
| Group 3         | 1.37 (0.55-3.41)    | 0.505          | 0.099    | 1.10 (0.44-2.79)       | 0.835          |
| Group 4         | 2.37 (0.93-6.01)    | 0.070          | 0.766    | 2.15 (0.84-5.49)       | 0.109          |
| Group 5         | 4.53 (1.96-10.46)   | < 0.001        | 1.427    | 4.17 (1.79-9.68)       | 0.001          |
| Group 6         | 4.72 (1.92-11.58)   | 0.001          | 1.437    | 4.21 (1.70-10.44)      | 0.002          |
| Group 7         | 5.76 (2.23-14.88)   | < 0.001        | 1.774    | 5.90 (2.27-15.33)      | < 0.001        |
| Group 8         | 10.27 (4.09-25.77)  | < 0.001        | 2.243    | 9.42 (3.70-23.97)      | < 0.001        |

OR, odds ratio; CI, confidence interval; HFRS, hospital frailty risk score.
